# Supplementary material
Source: HighWire-hosted journal article supplement (https://www.cmajopen.ca/highwire/filestream/89948/field_highwire_adjunct_files/1/open-2022-0104-2-at.pdf)

Supplemental Figure 4. Red Deer Opioid-related Deaths. Piecewise 95% CI in Orange, ARIMAX 95% CI in Pink. Intervention On 2018-10-01

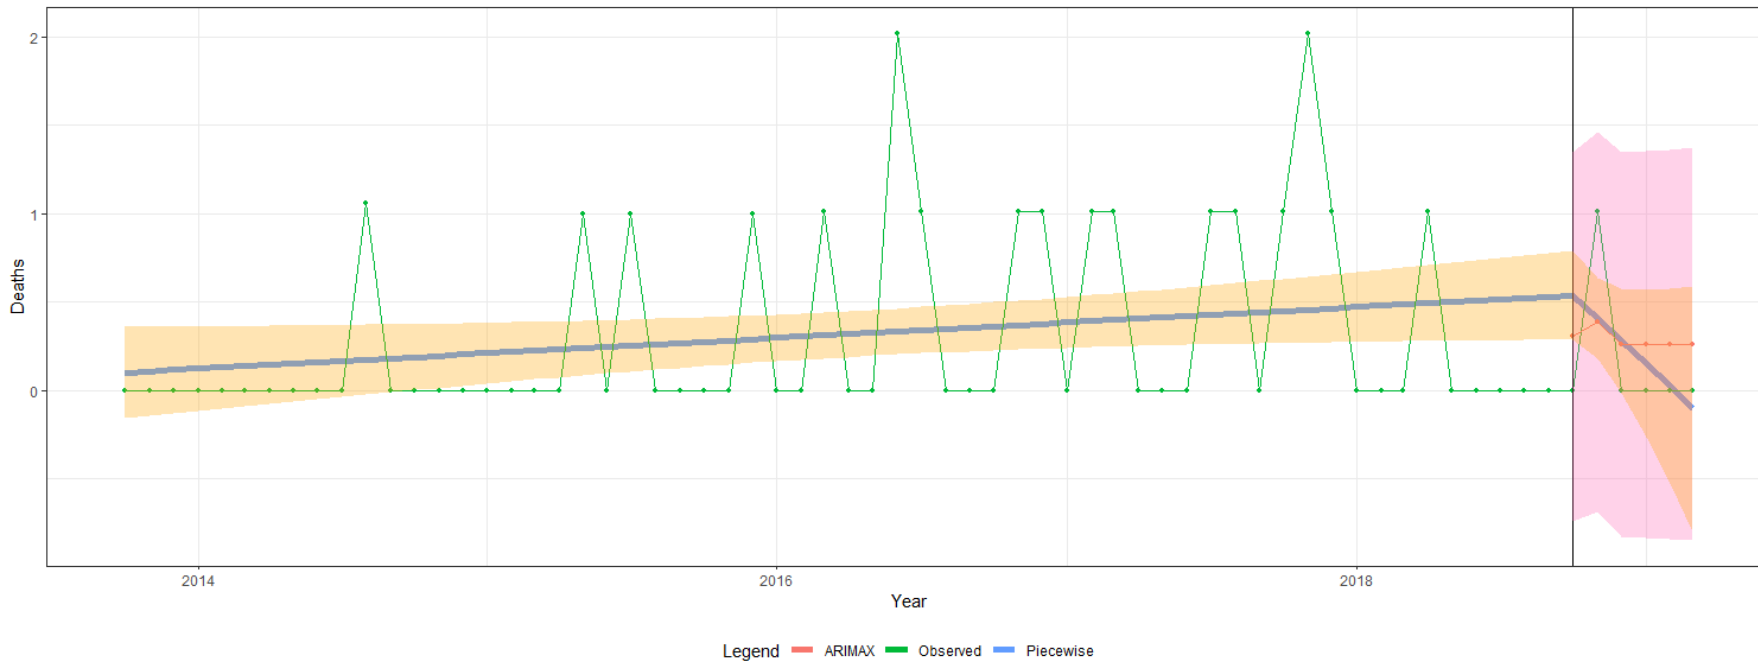

Supplement: open-2022-0104-2-at.pdf [file open-2022-0104-2-at.pdf]
